# Supplementary material for: Assessing diffusion in enzyme loaded sol–gel matrices
Source: Royal Society of Chemistry journal article supplement (doi:10.1039/c4ra01620c), 2014-01-01
Supplement: c4ra01620c1.pdf [file c4ra01620c1.pdf]

## Electronic Supplementary Information

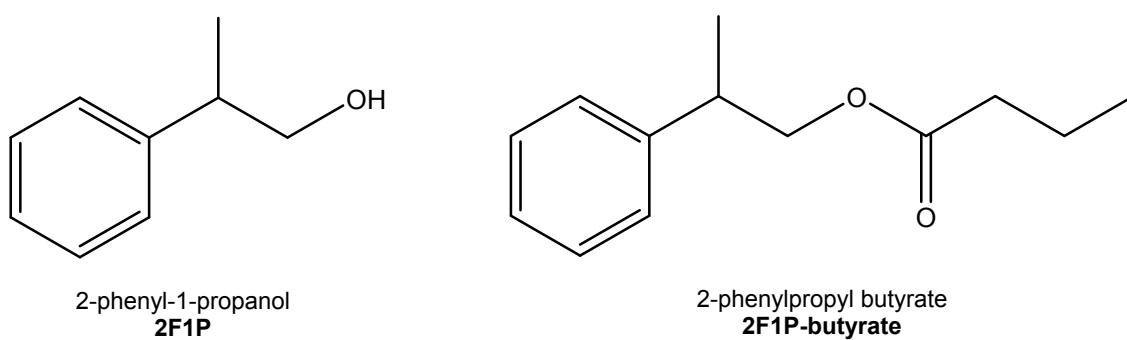

**Figure S 1.** Chemical structures of the reactions species.

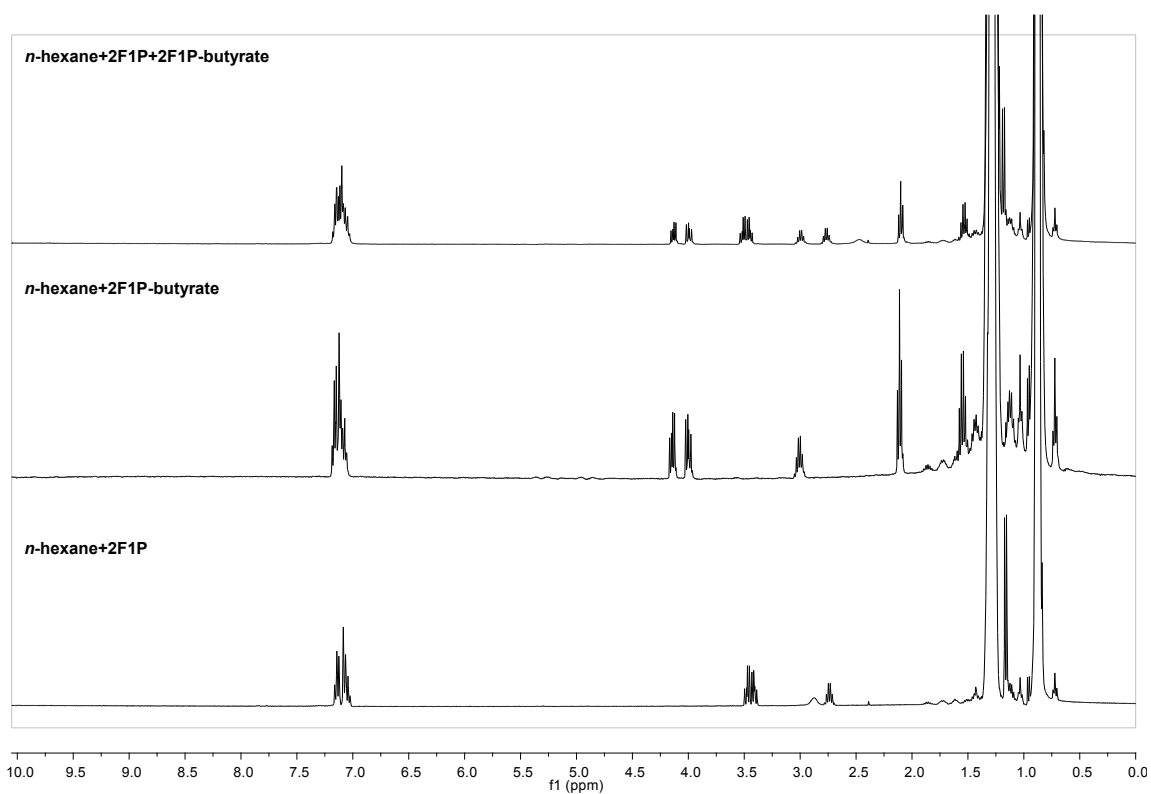

**Figure S 2.** <sup>1</sup>H NMR spectra of *n*-hexane solutions of 2F1P, 2F1P-butyrates, and mixture.

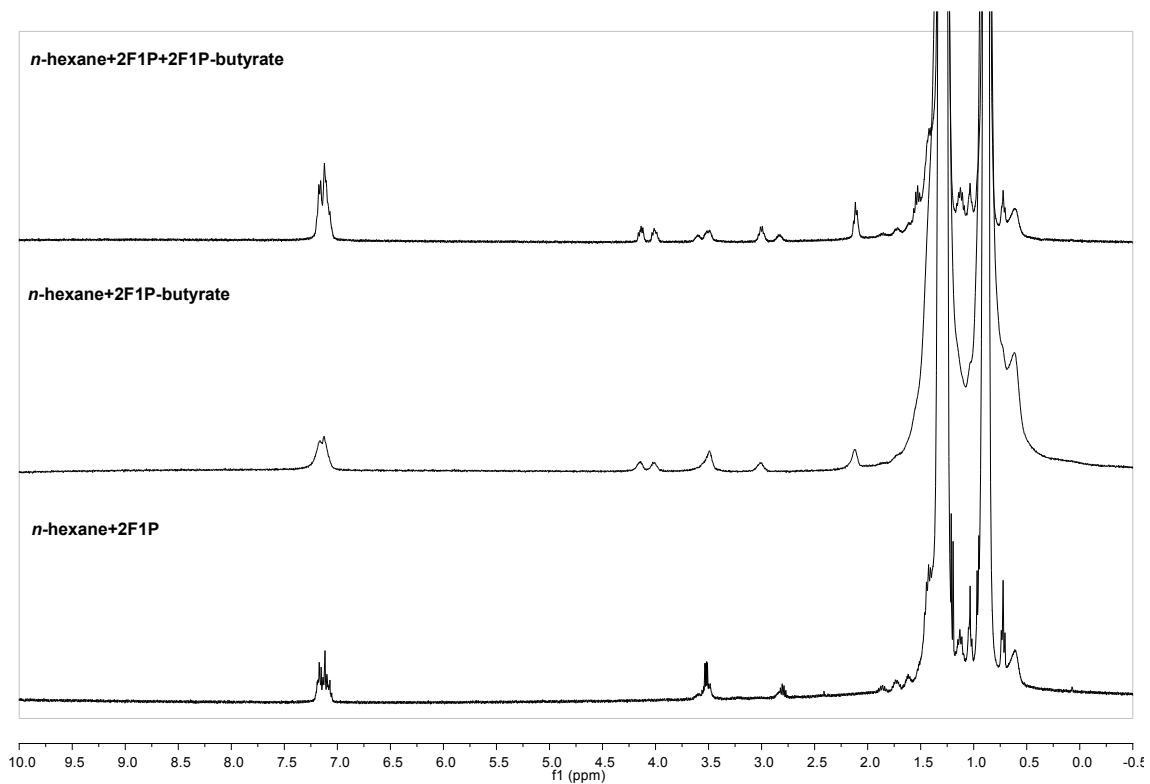

**Figure S 3.** <sup>1</sup>H NMR spectra of *n*-hexane solutions of 2F1P, 2F1P-butyrate, and mixture, in the presence of TMOS/BTMS matrix.

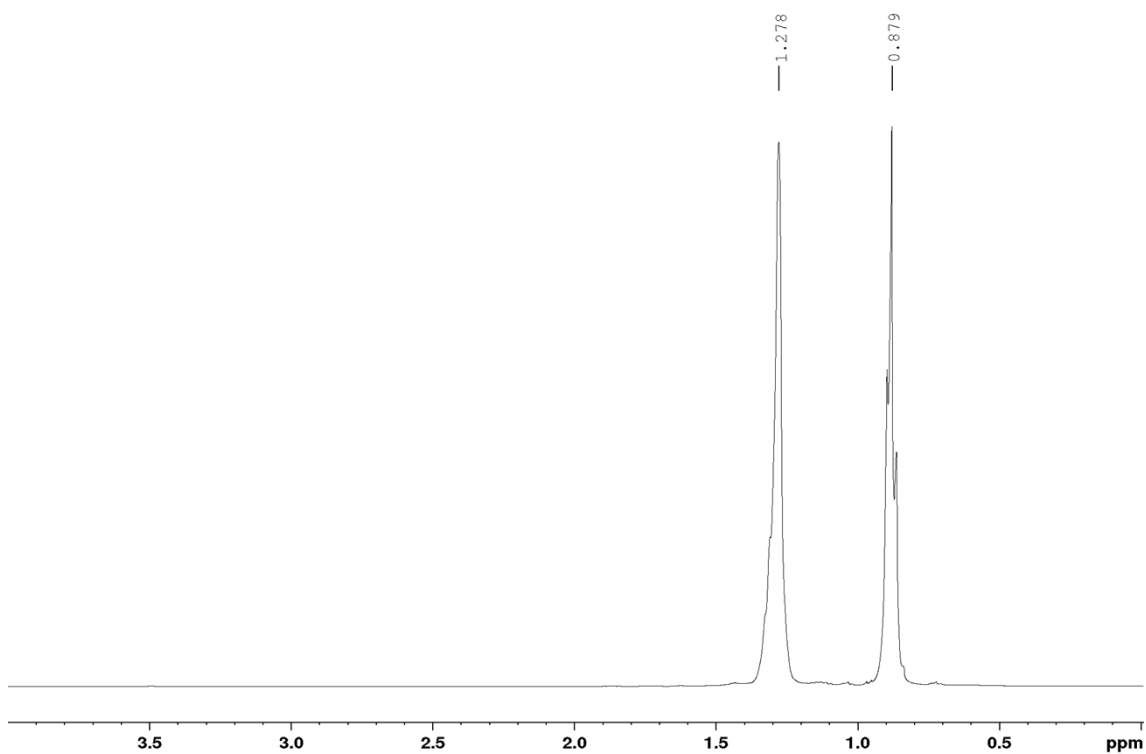

**Figure S 4.** <sup>1</sup>H NMR spectrum of *n*-hexane in the presence of TMOS/BTMS matrix.

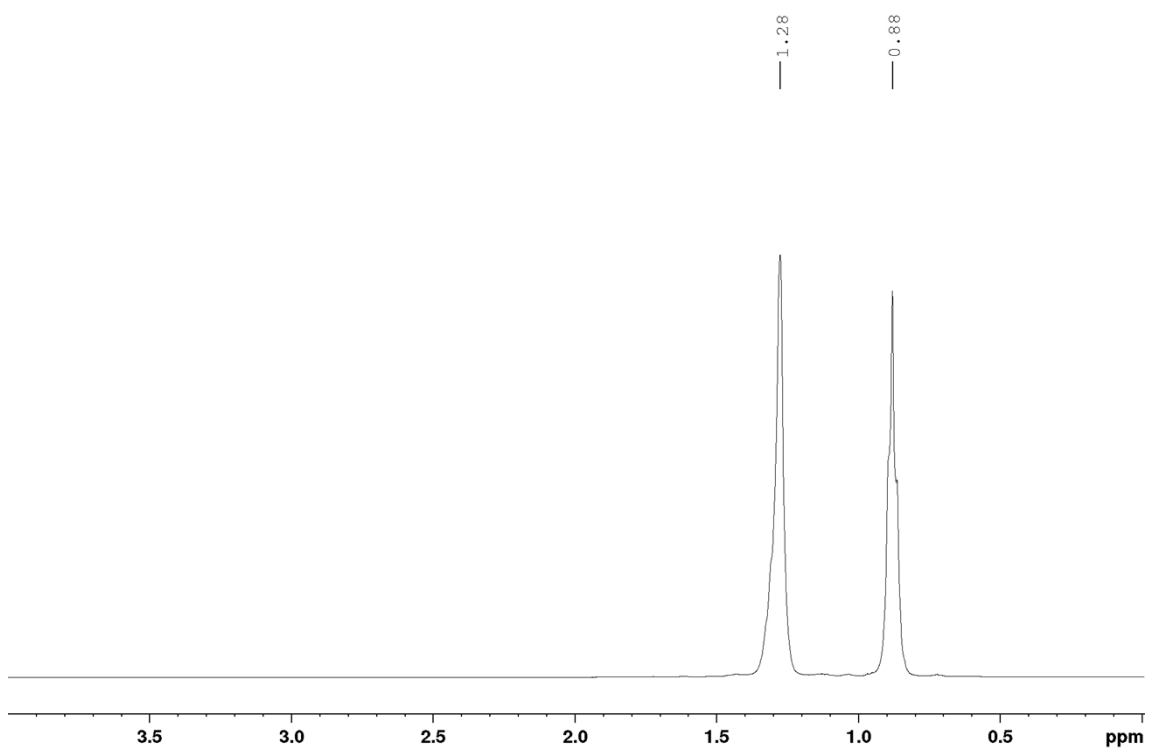

**Figure S 5.** <sup>1</sup>H NMR spectrum of *n*-hexane in the presence of TMOS/BTMS matrix with 0.5% of cutinase.

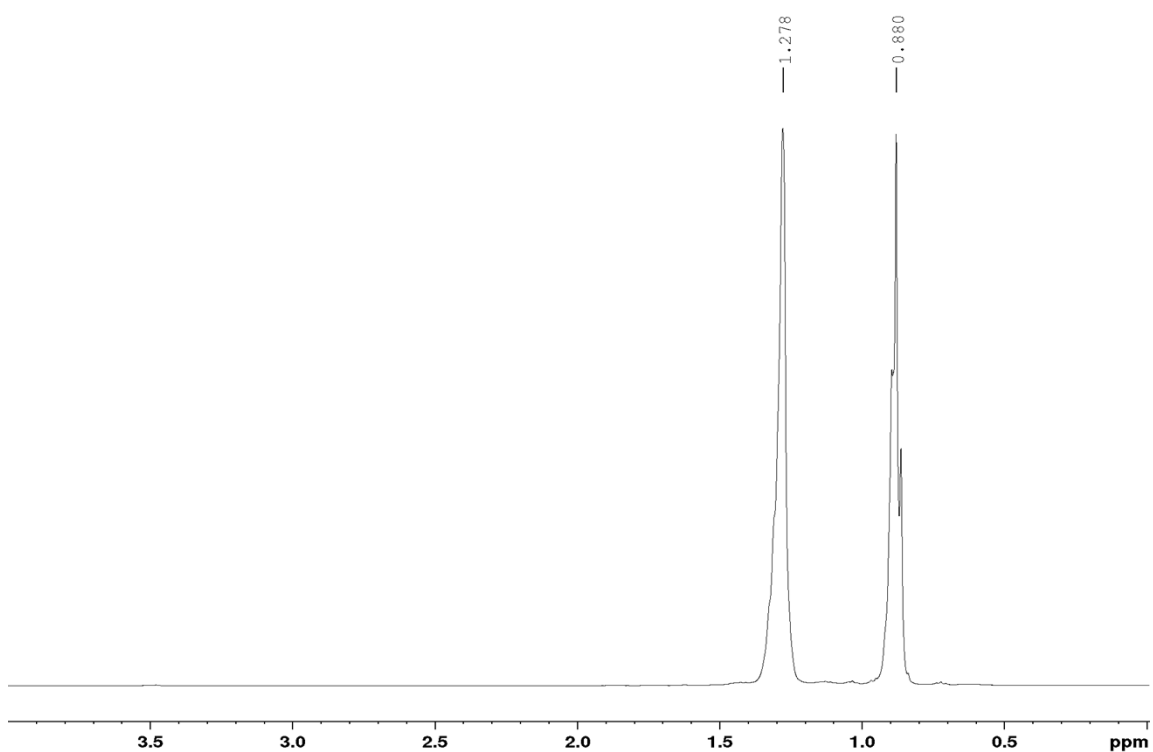

**Figure S 6.** <sup>1</sup>H NMR spectrum of *n*-hexane in the presence of TMOS/BTMS matrix with 1.0% of cutinase.

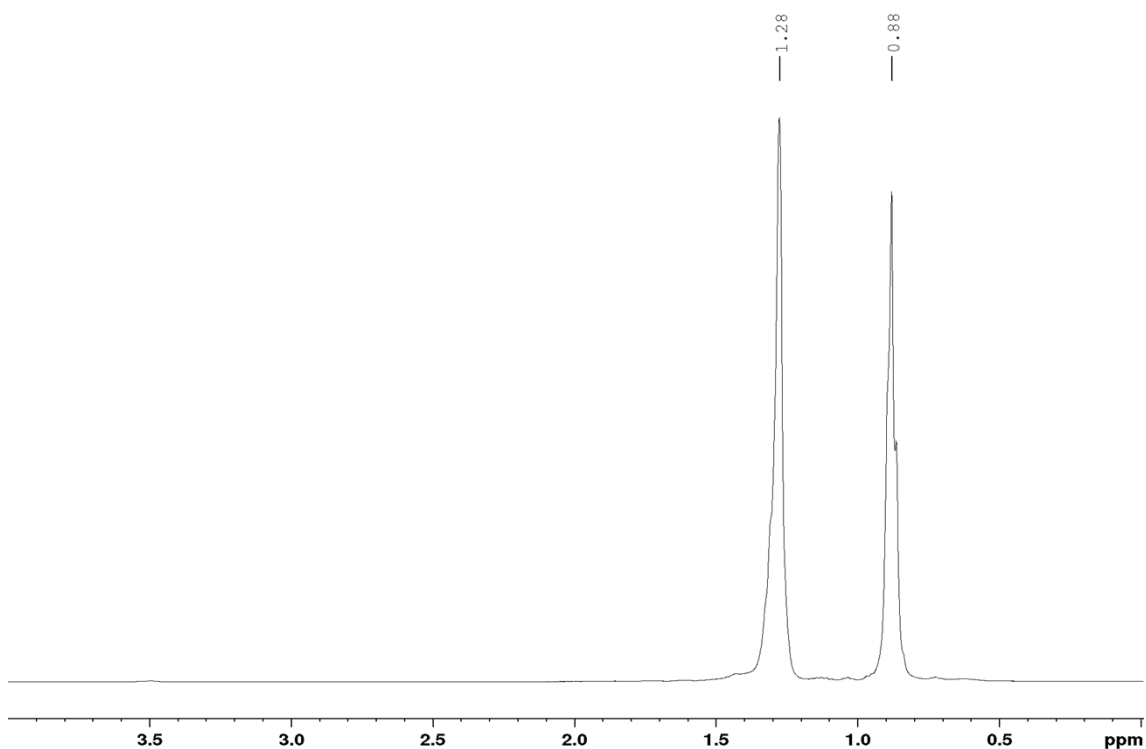

**Figure S 7.**  $^1\text{H}$  NMR spectrum of *n*-hexane in the presence of TMOS/BTMS matrix with 2.5% of cutinase.

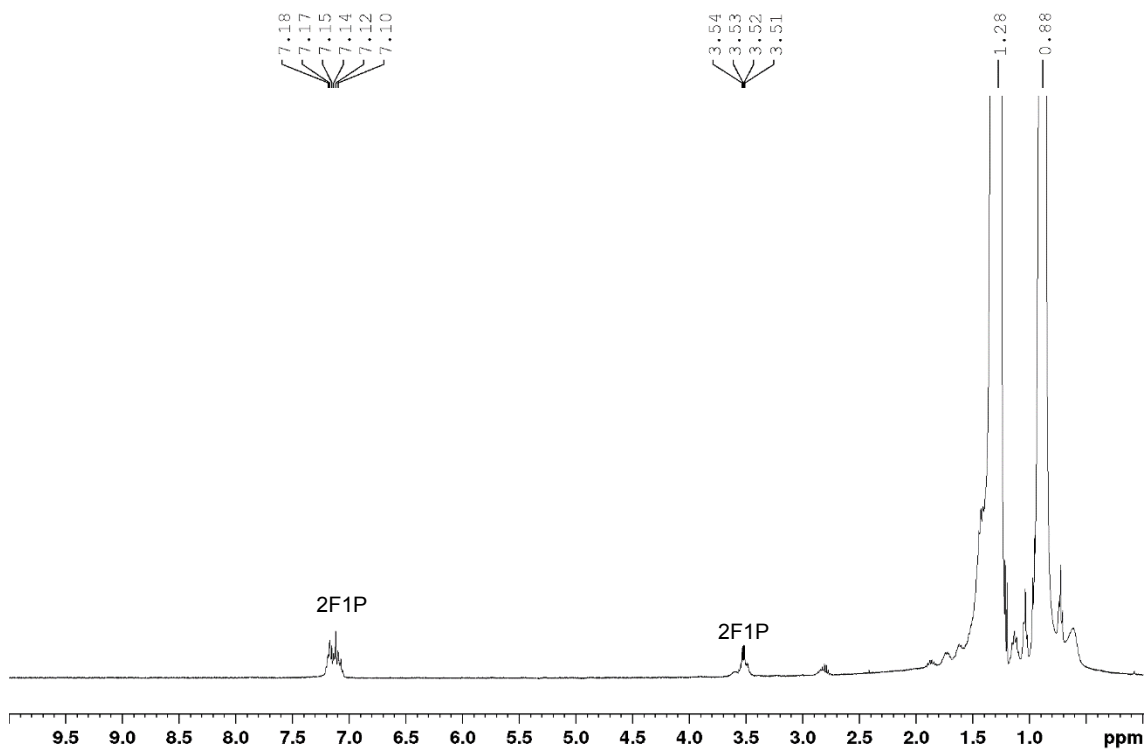

**Figure S 8.**  $^1\text{H}$  NMR spectrum of *n*-hexane+2F1P in the presence of TMOS/BTMS matrix.

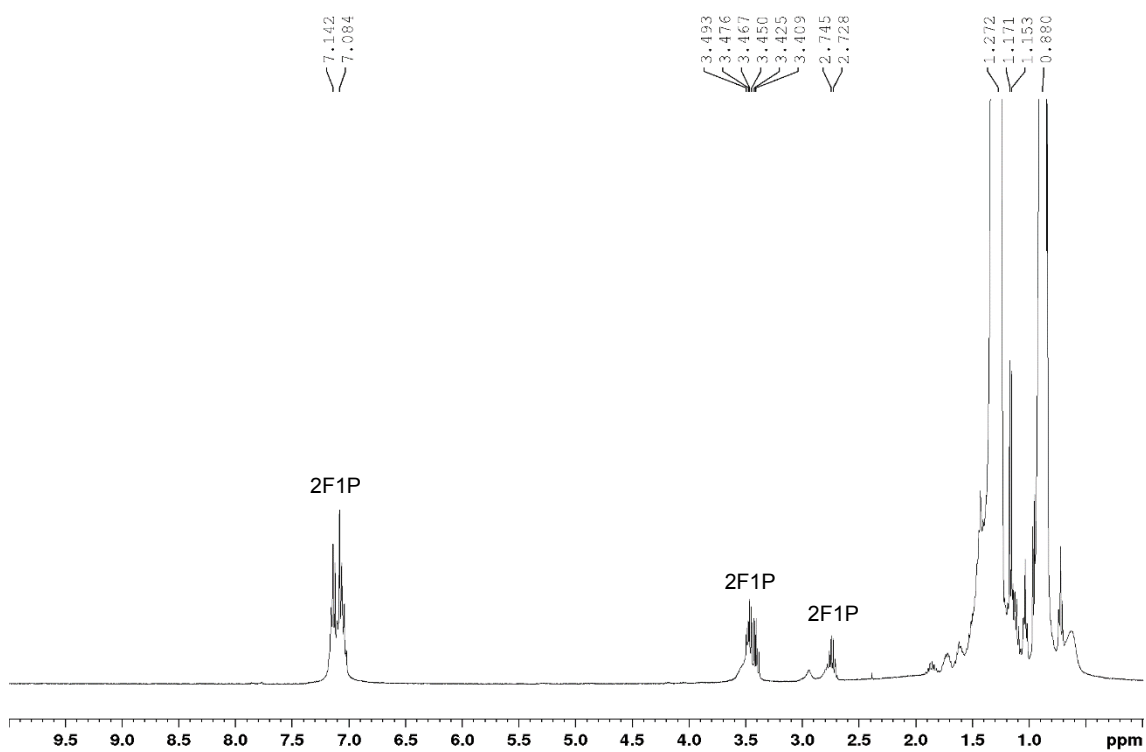

**Figure S 9.**  $^1\text{H}$  NMR spectrum of *n*-hexane+2F1P in the presence of TMOS/BTMS matrix with 0.5% of cutinase.

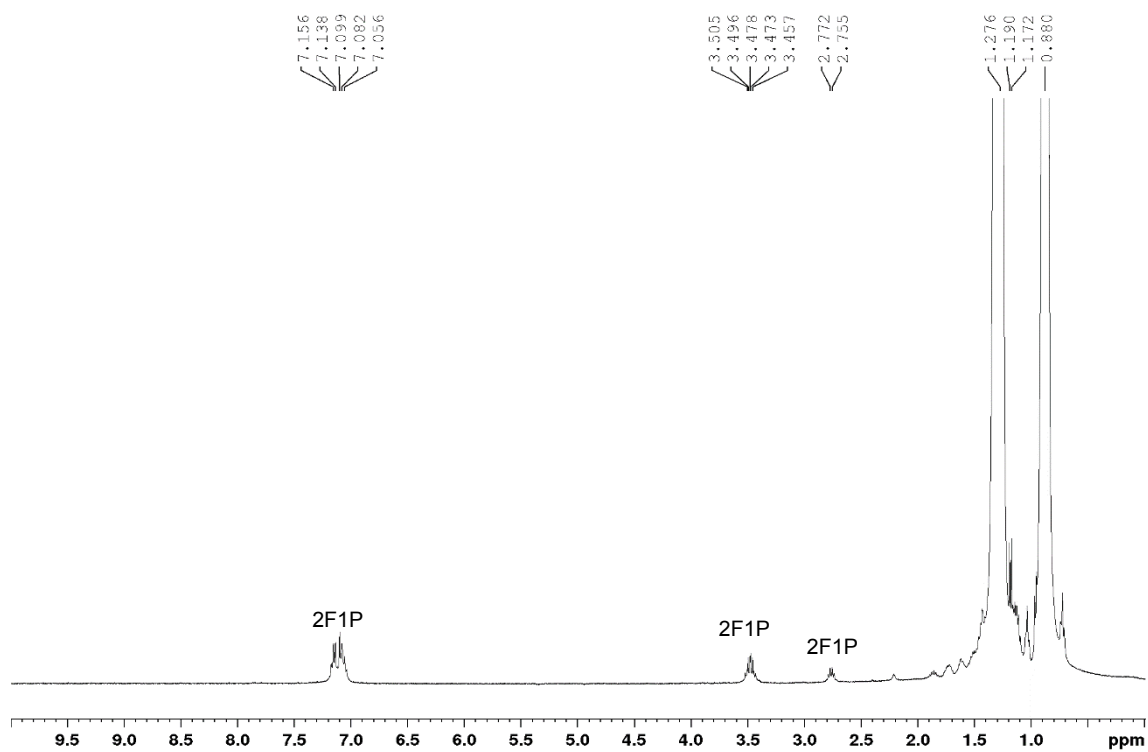

**Figure S 10.**  $^1\text{H}$  NMR spectrum of *n*-hexane+2F1P in the presence of TMOS/BTMS matrix with 1.0% of cutinase.

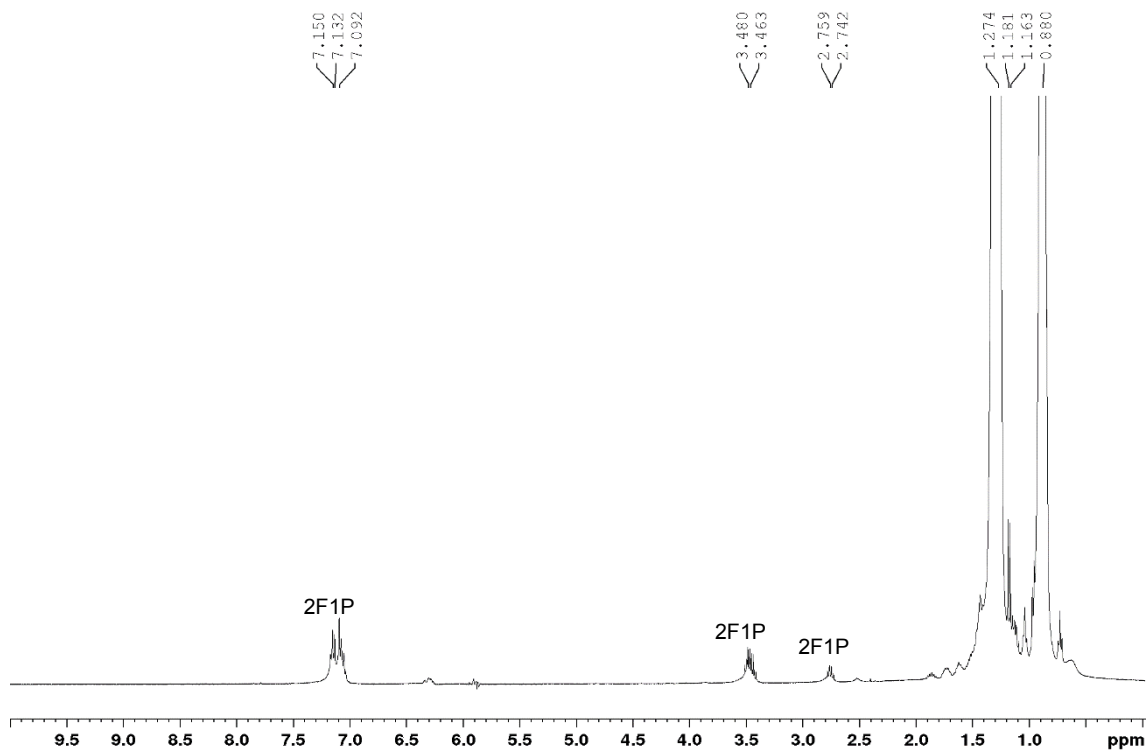

**Figure S 11.**  $^1\text{H}$  NMR spectrum of *n*-hexane+2F1P in the presence of TMOS/BTMS matrix with 2.5% of cutinase.

**Table S 1.** Self-diffusion coefficients, *D*, determined by HR-MAS PFGSE NMR for liquid solutions.

| System                              | Diffusion coefficient ( $\times 10^{-9} \text{ m}^2\text{s}^{-1}$ ) |           |               |
|-------------------------------------|---------------------------------------------------------------------|-----------|---------------|
|                                     | <i>n</i> -hexane                                                    | 2F1P      | 2F1P-butyrate |
| <i>n</i> -hexane                    | 4.33±0.02                                                           | ---       | ---           |
| <i>n</i> -hexane+2F1P               | 4.30±0.01                                                           | 2.62±0.02 | ---           |
| <i>n</i> -hexane+2F1P-butyrate      | 3.89±0.02                                                           | ---       | 2.34±0.02     |
| <i>n</i> -hexane+2F1P+2F1P-butyrate | 3.82±0.02                                                           | 2.35±0.02 | 2.36±0.01     |

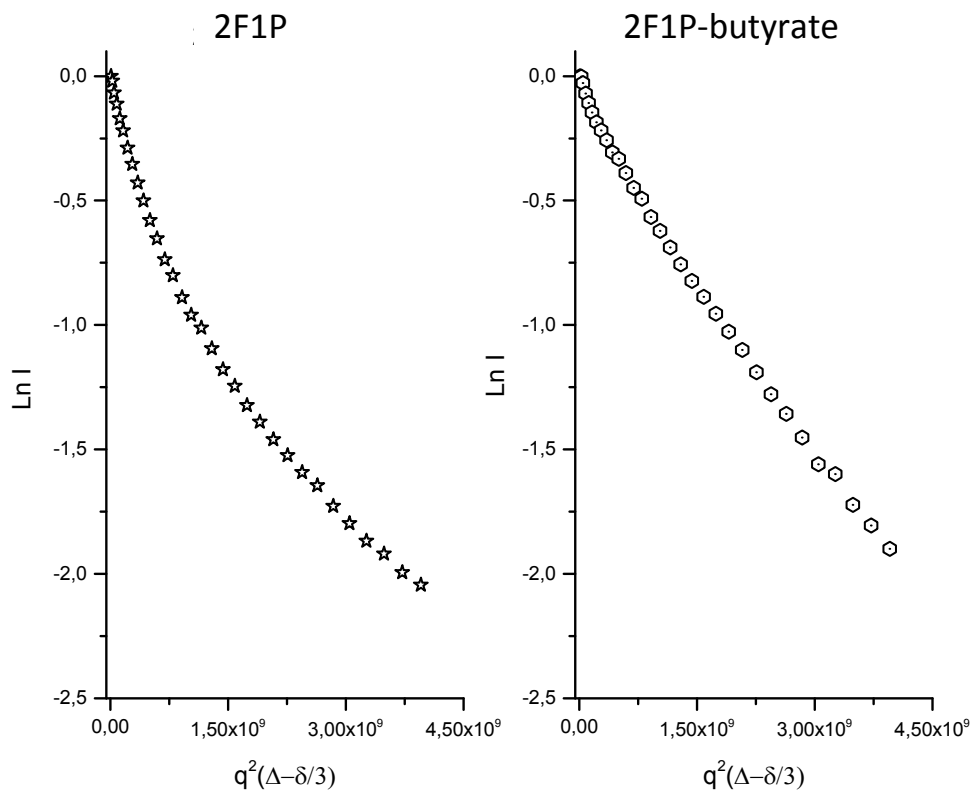

**Figure S 12.** Echo amplitude vs.  $q^2(\Delta-\delta/3)$  for 2F1P or 2F1P-butyrate in *n*-hexane, in the presence of the TMOS/BTMS sol-gel matrix without enzyme.

**Table S 2.** Self-diffusion coefficients,  $D_i$ , and respective populations,  $p_i$ , determined by HR-MAS PFGSE NMR for the studied solutions in TMOS/BTMS matrix.

| System                         | Diffusion coefficient ( $\times 10^{-9} \text{ m}^2 \text{ s}^{-1}$ ) |                    |                    |                    |                    |                    |                    |                    | 2F1P-butyrate<br>D |
|--------------------------------|-----------------------------------------------------------------------|--------------------|--------------------|--------------------|--------------------|--------------------|--------------------|--------------------|--------------------|
|                                | <i>n</i> -hexane                                                      |                    |                    |                    | 2F1P               |                    |                    |                    |                    |
|                                | $D_{\text{fast}}$                                                     | $D_{\text{slow}}$  | $p_{\text{fast}}$  | $p_{\text{slow}}$  | $D_{\text{fast}}$  | $D_{\text{slow}}$  | $p_{\text{fast}}$  | $p_{\text{slow}}$  |                    |
| <i>n</i> -hexane               | 2.73<br>$\pm 0.04$                                                    | 0.53<br>$\pm 0.02$ | 0.80<br>$\pm 0.01$ | 0.20<br>$\pm 0.01$ | ---                | ---                | ---                | ---                | ---                |
| <i>n</i> -hexane+2F1P          | 2.86<br>$\pm 0.06$                                                    | 0.56<br>$\pm 0.03$ | 0.76<br>$\pm 0.01$ | 0.24<br>$\pm 0.01$ | 2.48<br>$\pm 0.08$ | 0.36<br>$\pm 0.01$ | 0.52<br>$\pm 0.01$ | 0.48<br>$\pm 0.01$ | ---                |
| <i>n</i> -hexane+2F1P-butyrate | 1.65<br>$\pm 0.02$                                                    | 0.24<br>$\pm 0.03$ | 0.71<br>$\pm 0.01$ | 0.29<br>$\pm 0.01$ | ---                | ---                | ---                | ---                | 0.52<br>$\pm 0.01$ |
